# A combined pipeline for quantitative analysis of human brain cytoarchitecture

Irene Costantini<sup>\*†1,2</sup>, Giacomo Mazzamuto<sup>†2,1</sup>, Matteo Roffilli<sup>3</sup>, Filippo Castelli<sup>1,4</sup>,  
Mattia Neri<sup>3</sup>, Giovanni Lughì<sup>3</sup>, Andrea Simonetto<sup>3</sup>, Annunziata Laurino<sup>1</sup>,  
Erica Lazzeri<sup>1,4</sup>, Luca Pesce<sup>1,4</sup>, Christophe Destrieux<sup>5</sup>, Ludovico Silvestri<sup>1,2,4</sup>,  
Valerio Conti<sup>6</sup>, Renzo Guerrini<sup>6</sup>, Francesco S. Pavone<sup>1,2,4</sup>

<sup>1</sup>European Laboratory for Non-Linear Spectroscopy (LENS), University of Florence, Sesto Fiorentino, Italy

<sup>2</sup>National Institute of Optics (INO), National Research Council (CNR), Sesto Fiorentino, Italy

<sup>3</sup>Bioretics srl, Cesena, Italy

<sup>4</sup>Department of Physics, University of Florence, Italy

<sup>5</sup>UMR 1253, iBrain, Université de Tours, Inserm, Tours, France

<sup>6</sup>Pediatric Neurology, Neurogenetics and Neurobiology Unit and Laboratories,  
A. Meyer Children's Hospital, University of Florence, Florence, Italy.

\* corresponding author    † these authors contributed equally to the work

## Abstract

The 3D analysis of the human brain architecture at cellular resolution is still a big challenge. In this work, we propose a pipeline that solves the problem of performing neuronal mapping in large human brain samples at micrometer resolution. First, we introduce the SWITCH/TDE protocol: a robust methodology to clear and label human brain tissue. Then, we implement the 2.5D method based on a Convolutional Neural Network, to automatically detect and segment all neurons. Our method proved to be highly versatile and was applied successfully on specimens from different areas of the cortex originating from different subjects (young, adult and elderly, both healthy and pathological). We quantitatively evaluate the density and, more importantly, the mean volume of the thousands of neurons identified within the specimens. In conclusion, our pipeline makes it possible to study the structural organization of the brain and expands the histopathological studies to the third dimension.

## 1 Introduction

The three-dimensional reconstruction of large volumes of human brain tissue at cellular resolution remains one of the biggest technical challenges of neuroscience. Nowadays, structural analyses are obtained using traditional processes based on 2D evaluation of thin slices, but they still suffer from significant drawbacks. Such limitations are inherent to the bidimensional nature of the classical slide-based preparation, and include: low sensitivity for sparse features, difficult assessment of dimensions, alteration of morphology, visual artifacts (different orientation or distribution), and sampling bias. Despite the substantial advantages prompted by automatic histology instrumentation and serial sectioning [1], lack of three-dimensionality affects the quality of the produced data and reliability of the analysis.

Recent advances in tissue imaging — in terms of optical clearing, fluorescent staining, and microscopy techniques — have paved the way to high-resolution 3D reconstruction of the brain [2].

13 Indeed, tissue clearing makes antigens and light penetrate deep inside the sample, enabling fluores-  
14 cence imaging through high-resolution optical techniques. Multiple methods have been developed to  
15 achieve sound clearing and homogeneous staining, but only a few of them have been applied to human  
16 tissue. Such samples present specific challenges in comparison to animal models: variability of post-  
17 mortem fixation conditions, presence of blood inside the vessels, autofluorescence signals coming from  
18 lipofuscin-type pigments, and, finally, needs of exogenous labeling [3]. Alteration of antigens, due to  
19 fixation and/or long storage, prevent good immunostaining recognition. Normally, diffusion limits the  
20 homogeneous penetration of the dye inside the tissue; voluminous macromolecules, like antibodies, can  
21 penetrate only a few dozens of microns inside the sample. Among the various techniques that favor  
22 diffusion and increase tissue transparency, tissue transformation techniques such as the CLARITY  
23 method [4] and its adaptations have had considerable success. However, they also have limitations.  
24 Some were developed for application only to specific samples: e.g. pediatric tissue or controlled post  
25 mortem fixation conditions [5,6]. Others demonstrated compatibility with few antibodies and/or can  
26 achieve a staining depth of only a few tens of microns and/or are characterized by very long clearing  
27 time [7–12]. Recently, Ku et al. [13] introduced ELAST, a technology that transforms tissues into  
28 elastic hydrogel allowing the homogeneous staining of 1 cm-thick sections with various antibodies;  
29 however, the preparation of the sample requires sophisticated custom-made equipment and long pro-  
30 cessing time (20 days). Organic-based techniques were adapted to clear and label human brain tissue,  
31 but also in this case they need specific sample preparations: fresh-frozen samples [14], fetal brains [15],  
32 or in-situ controlled full body perfusion fixation [16]. In conclusion, up to now, we have no flexible  
33 strategy for fast clearing of human brain specimens from different ages, formalin fixed for a long time,  
34 and compatible with different antibodies labelling.

35 An additional consideration that needs to be addressed is that the advances in tissue clearing  
36 haven not been followed by innovation on large-scale data analysis and management. High-throughput  
37 computational approaches are required to scale-up the processing the significant amount of data pro-  
38 duced by 3D anatomical reconstructions obtained by the combination of clearing techniques with  
39 high-resolution optical methods. Supervised and semi-supervised methods for localization and seg-  
40 mentation of neuron somata have been proposed, based on advanced classical image processing meth-  
41 ods [17, 18], Deep Learning (DL) [19] or combinations of DL with classical processing methods, as  
42 described in [20], where "semantic deconvolution" based on Convolutional Neural Networks (CNN) is  
43 performed in order to enhance the imaged volumes before applying a mean-shift clustering algorithm.  
44 However, this approach enables cell counting but not volume assessment. Semi-supervised region  
45 growing approaches [20] use three-dimensional image processing algorithms to find the center of the  
46 soma and then repeatedly grow the volume to determine the estimated shapes. Computational issues  
47 aside, the main drawbacks of this general method are represented by the need for a precise definition  
48 of soma centers, the difficulty of finding all of the centers in a large volume and the complexity of  
49 correctly limiting the growth process to an optimal contour. Native Machine Learning techniques such  
50 as Convolutional Neural Networks [21] and 3D Convolutional Neural Networks [22], on the other hand,  
51 are able to better model visual patterns but are demanding both in terms of the required computing  
52 power and the extent of the human-annotated ground truth needed for training (which increases ex-  
53 ponentially when moving from the 2D to the 3D domain). Semi-supervised 3D CNN methods have  
54 been proposed [19] to alleviate the need for extensive volumetric annotation but they require very  
55 high computational power capabilities, suffer from limited scalability and are not able to accurately  
56 reconstruct soma surfaces.

57 Considering the difficulties of human tissue labeling, that decrease the quality of the produced  
58 images, and the limits of automatic geometric assessment analysis, the possibility of quantitative  
59 evaluates neuronal volumes in human brain reconstruction is still absent. Here, we propose a pipeline  
60 that faces different challenges of brain mapping: sample preparation and big data analysis. Indeed,  
61 to extract quantitative information not only is it important to optimize each single step, but also to  
62 devise a synergic pipeline that integrates together all the different aspects. First, we describe a novel  
63 flexible methodology, the SWITCH/TDE protocol, to perform reliable clearing and labeling of human

64 brain tissues. Then, we set up a fast and scalable Machine Learning-based strategy, that we refer to  
65 as the 2.5D approach, to perform automated three-dimensional neuronal segmentation and to extract  
66 quantitative data.

## 67 2 Results

### 68 2.1 The SWITCH/TDE clearing and labeling approach

69 Penetration of macromolecules and light deep inside the sample are critical processes that are necessary  
70 to obtain homogeneous staining of the sample and to reach high transparency, which is essential to per-  
71 form 3D optical reconstruction with fluorescence imaging. In order to obtain a reliable methodology to  
72 label and clear human brain samples from different regions, subjects, and fixation conditions, we mod-  
73 ified the SWITCH tissue transformation protocol [9] and we combined it with the 2, 2'-thiodiethanol  
74 (TDE) clearing method [5] (Figure 1a). Amongst the various techniques, we decided to use the  
75 SWITCH methodology since it allows to control the chemical interaction time and kinetics taking  
76 place inside the tissue. By modifying the solutions used during the fixation and clearing, we achieved  
77 a more uniform processing of tissues up to 1 mm. At first, we optimized the fixation condition during  
78 the SWITCH protocol lowering the concentration of glutaraldehyde (from 1% to 0.5%) during the  
79 SWITCH ON step (data not shown). Then, depending on tissue characteristics, we incubated the  
80 different samples in the SWITCH clearing solution at 70 °C from 6 hours to one day. Finally, we used  
81 the aqueous agent TDE to reduce the Refractive Index (RI) inhomogeneity between the tissue and  
82 the surrounding medium, thus minimizing the scattering of light and guaranteeing final transparency  
83 of the sample (Figure 1b). Differently from our previous paper [5], we used one-day serial incubations  
84 at Room Temperature (RT) up to a concentration of 68% TDE in Phosphate Buffered Saline (PBS)  
85 to obtain homogeneous clearing of both grey and white matter. The final solution is characterized by  
86 a refractive index of 1.46 equal to that of the UV silica glass used for imaging. The combination of  
87 the two techniques allows deep tissue imaging with Two-Photon Fluorescence Microscopy (TPFM):  
88 small molecules as SYTOX<sup>TM</sup> Green can be imaged up to 1 mm in depth, while antibodies can ho-  
89 mogeneously label 500  $\mu\text{m}$ -thick slices, respectively (Figures 1c, d). Finally, we demonstrated the  
90 compatibility of the SWITCH/TDE method with human brain immunostaining using a variety of  
91 different antibodies (Table 1), which were able to stain neuronal cells, GABAergic interneurons and  
92 interneurons subtypes, neuronal fibers, glial cells and microvasculature. Incubation time and temper-  
93 ature parameters optimizations are described in the supplementary materials (Supplementary Figure  
94 1). Representative images of the different staining are shown in Figure 1e.

### 95 2.2 3D reconstruction of cerebral cortex samples

96 The SWITCH/TDE protocol is able to clear different areas of the human brain cortex from subjects of  
97 different ages (pediatric, adult, and elderly), obtained from biopsies collected during epilepsy surgery  
98 interventions or autopsy stored up to 7 years in formalin. To demonstrate the versatility of the  
99 method, four different human brain specimens, from healthy and diseased patients, were analyzed.  
100 Two different portions of the left prefrontal cortex from an adult (Male, sample 1) and an elderly  
101 subject (Female, 99 years old, no Alzheimer's disease but initial cognitive decline, no hypertension;  
102 sample 2) One dysplastic brain sample from the left temporo-occipital cortex of a 29-year-old man  
103 operated to treat drug resistant epilepsy due to focal cortical dysplasia Type IIa (FCDIIa), and  
104 one dysplastic brain sample from the left temporo-parietal cortex of an eight-year-old boy operated  
105 to treat drug resistant epilepsy due to hemimegalencephaly (HME), respectively samples 3 and 4.  
106 The samples were treated with the SWITCH/TDE clearing method and immunolabeled with the  
107 Neuron-specific Nuclear protein (NeuN) to detect neurons and DAPI for nuclear staining (samples  
108 area of  $\approx (1 \times 1) \text{cm}^2$  and depth of  $\approx 500 \mu\text{m}$ ). Imaging was performed with a custom-made Two-  
109 Photon Fluorescence Microscope designed to perform mesoscopic reconstruction with a resolution of

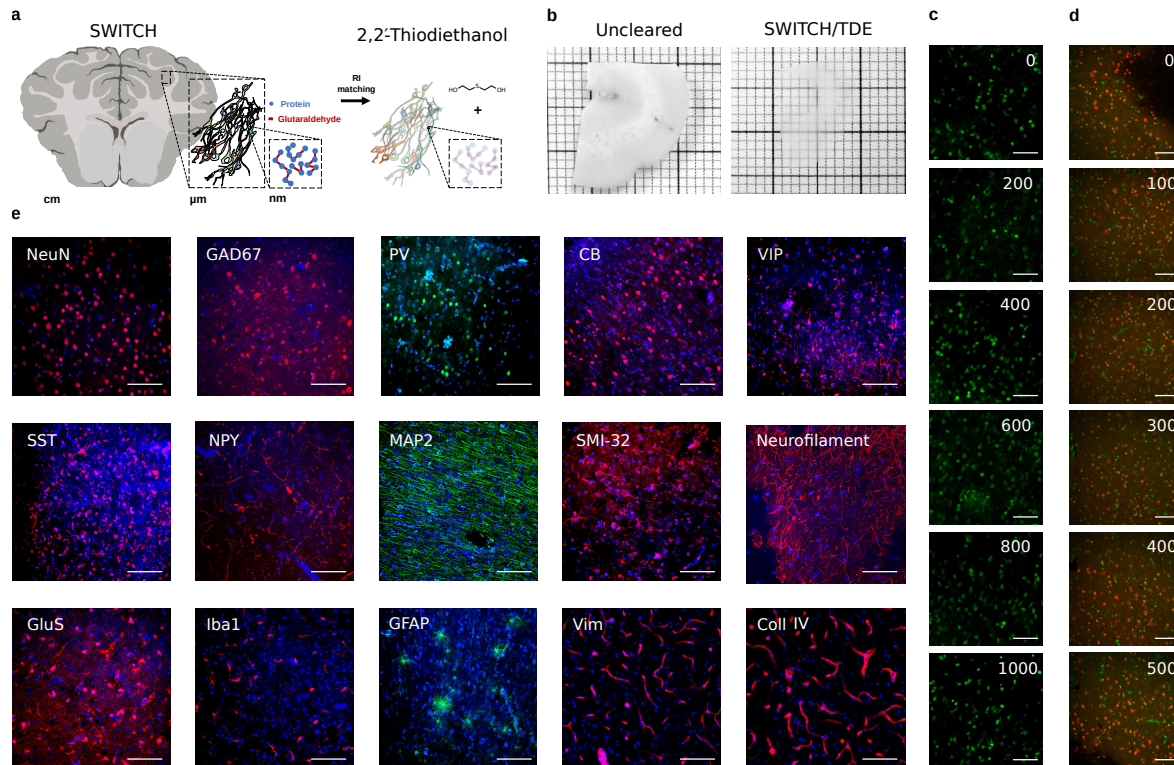

**Figure 1: The SWITCH/TDE clearing approach** (a) Schematic illustration of the SWITCH/TDE clearing method. (b) 1 mm-thick slice of an adult human brain sample before and after the treatment. (c) Images of SYTOX™ Green labeled tissue at different depths. Scale bar = 100 μm. (d) Images of NeuN immunostained tissue at different depths. Scale bar = 50 μm. Acquisition obtained with TPFM. (e) Representative images of cleared tissues immunostained with various antibodies and DAPI (4',6-Diamidino-2-Phenylindole, Dihydrochloride). Scale bar = 50 μm. Acronym list: Neuron-specific Nuclear protein (NeuN; all neurons), Microtubule-Associated Protein 2 (MAP2; pyramidal cells), Nonphosphorylated neurofilament protein (SMI32; pyramidal cells), Glutamic Acid Decarboxylase (GAD67; all GABAergic interneurons), Parvalbumin (PV; GABAergic interneurons subtype), Calbindin (CB; GABAergic interneurons subtype), Vasointestinal peptide (VIP; GABAergic interneurons subtype), Somatostatin (SST; GABAergic interneuron subtype), Neuropeptide Y (NPY; GABAergic interneuron subtype), Neurofilament (NF), Ionized calcium Binding Adaptor molecule 1 (Iba1; glial cells), Glial Fibrillary Acidic Protein (GFAP; glial cells), Glutamine synthetase (GluS), Vimentin (Vim; Microvasculature), Collagen IV (Coll IV; microvasculature).

| Molecule                  | Company                  | Cat. n.  | Host    | P/M | Dilution |
|---------------------------|--------------------------|----------|---------|-----|----------|
| NeuN                      | Merck                    | ABN91    | Chicken | P   | 1:50     |
| GAD67                     | Santa Cruz               | sc-28376 | Mouse   | M   | 1:200    |
| GAD65/67                  | St John's Lab            | STJ93195 | Rabbit  | P   | 1:200    |
| PV                        | Abcam                    | ab11427  | Rabbit  | P   | 1:200    |
| PV                        | Abcam                    | ab32895  | Goat    | P   | 1:200    |
| CB                        | Abcam                    | ab207528 | Rabbit  | M   | 1:200    |
| VIP                       | Abcam                    | ab214244 | Rabbit  | M   | 1:200    |
| SST                       | Abcam                    | ab30788  | Rat     | M   | 1:200    |
| NPY                       | Abcam                    | ab6173   | Sheep   | P   | 1:200    |
| NPY                       | Abcam                    | ab112473 | Mouse   | M   | 1:200    |
| SMI-32                    | Merck                    | NE1023   | Mouse   | M   | 1:200    |
| Neurofilament             | Abcam                    | ab4680   | Chicken | P   | 1:200    |
| GluS                      | Merck                    | MAB302   | Mouse   | M   | 1:200    |
| MAP2                      | Abcam                    | ab5392   | Chicken | P   | 1:200    |
| GFAP                      | Abcam                    | ab194324 | Rabbit  | M   | 1:200    |
| Iba1                      | Abcam                    | ab195031 | Rabbit  | M   | 1:200    |
| Coll IV                   | Abcam                    | ab6586   | Rabbit  | P   | 1:200    |
| Vim                       | Abcam                    | ab8069   | Mouse   | M   | 1:200    |
| Anti-Rat IgG, AF 568      | Abcam                    | ab175475 | Donkey  | P   | 1:200    |
| Anti-Rabbit IgG, AF 568   | Abcam                    | ab175470 | Donkey  | P   | 1:200    |
| Anti-Chicken IgY, AF 568  | Abcam                    | ab175711 | Goat    | P   | 1:200    |
| Anti-Mouse IgG, AF 568    | Abcam                    | ab175700 | Donkey  | P   | 1:200    |
| Anti-Sheep IgG, AF 568    | Abcam                    | ab175712 | Donkey  | P   | 1:200    |
| Anti-Rabbit IgG, AF 488   | Abcam                    | ab150077 | Goat    | P   | 1:200    |
| Anti-Chicken IgY, AF 488  | Abcam                    | ab150169 | Goat    | P   | 1:200    |
| DAPI                      | Thermo Fisher Scientific | D1306    |         |     | 1:1000   |
| SYTOX <sup>TM</sup> Green | Thermo Fisher Scientific | S7020    |         |     | 1:1000   |

Table 1: **Table summarizing the dyes tested in this study.** The P/M column denotes polyclonal vs monoclonal antibodies. The same abbreviations used in Figure 1 are used. AF is a shorthand for Alexa Fluor<sup>®</sup>.

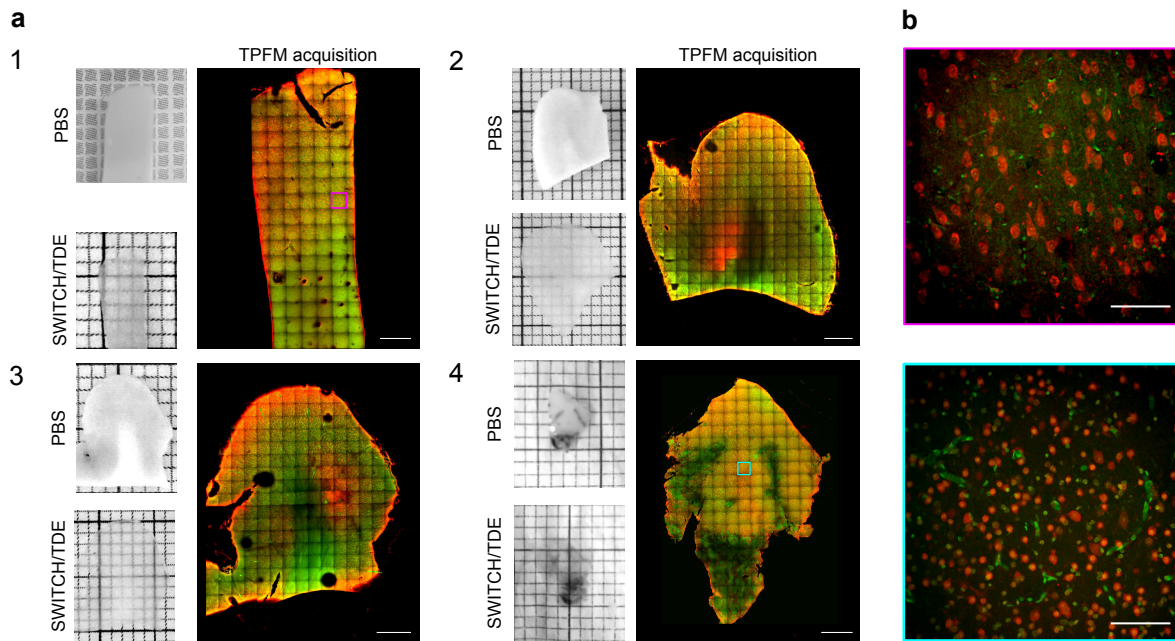

Figure 2: **3D mesoscopic reconstruction.** (a) Pictures showing the four analyzed human brain specimens before and after SWITCH/TDE clearing. A representative middle plane ( $z \approx 200 \mu\text{m}$ ) of the mesoscopic reconstruction obtained with TPFM is shown next to each specimen. Scale bar = 1 mm. Specimens 1 and 2: two different portions of the left prefrontal cortex from adult and elderly subjects. Specimens 3 and 4: two surgically removed pieces from patients affected by Focal Cortical Dysplasia Type 2a (FCDIIa) and by Hemimegalencephaly (HME), respectively. (b) Magnified insets of specimen 1 (magenta) and 4 (cyan) showing the native resolution of the acquisition. Tissues were stained with an anti-NeuN antibody (in red) and with DAPI (in green). Scale bar = 100  $\mu\text{m}$

110  $(0.88 \times 0.88 \times 2) \mu\text{m}^3$ , see Figure 2. After the acquisition, adjacent stacks were aligned and merged  
111 together using a custom-made stitching software called ZetaStitcher [23].

### 112 **2.3 2.5D approach for automatic neuronal volume identification**

113 The volumetric 3D reconstruction obtained with the TPFM consists of tens of GB of data. In par-  
114 ticular, the fused volumes of the four samples acquired in this work are sized 19, 50, 57 and 52 GB.  
115 In order to automatically obtain volumetric information from the 3D reconstruction of the samples  
116 imaged with the TPFM, we implemented a novel 2.5D approach based on a Convolutional Neural  
117 Network (CNN) for pixel-based classification followed by an analytical reconstruction of 3D polygo-  
118 nal meshes (Figure 3a). The network uses information jointly from the red and green channels (i.e.  
119 neurons vs nuclei and tissue autofluorescence) to assign to each pixel a probability of belonging to  
120 either the neuron or the background class (Figure 3b and Supplementary video 1). We adopted a pure  
121 2-class fully convolutional CNN that transforms the multichannel source image into a new grayscale  
122 one, the so-called probability heatmap. 2D images are processed independently by the neural net-  
123 work, but the resulting heatmaps are reassembled back into a 3D stack, what we refer to as a 2.5D  
124 approach. Instance semantic segmentation, based on an iso-surface finding algorithm, is then per-  
125 formed, with a statistical acceptance threshold of 0.5, to the heatmap volume in order to extract the  
126 three-dimensional surfaces of each uniquely identified polyhedron.

127 The use of a relatively light model (in terms of number of free parameters) allowed us to obtain  
128 good segmentation results with advantages on both computational costs and annotation requirements:  
129 fast inference times allowed us to obtain results in almost-real-time (with respect to the acquisition  
130 time at the microscope) while the number of trainable parameters made it possible to train the model  
131 in a supervised fashion using a manageable amount of manually annotated data necessary for the  
132 ground truth.

133 The statistical assessment of the 2.5D performance was determined by analyzing four representative  
134 stacks of  $(100 \times 100 \times 100) \mu\text{m}^3$ , one for each specimen. Each stack was independently manually  
135 annotated by an operator and automatically segmented by the 2.5D approach, resulting in a total  
136 number of 220 segmented neurons. Figure 3c shows the comparison between the manual annotations  
137 and the automatic reconstruction for one of these sub-volumes. For each specimen we first applied a  
138 false positive reduction strategy to remove each polyhedron, representing one neuron, with a volume  
139 of less than  $100 \mu\text{m}^3$ , then we calculated the network accuracy on several metrics. The reported  
140 values have been computed on a macro statistics basis, i.e. firstly the average of all data of one single  
141 specimen is computed and then the average and standard deviation on the four specimens is derived.  
142 The volumetric true and false positive fractions designate the extent to which the sub-volume of each  
143 neuron detected by the 2.5D segmentation pipeline overlaps with the GT volume or the background  
144 and are, respectively equal to  $(69 \pm 6) \%$  and  $(26 \pm 14) \%$ . The total number of neurons found by the  
145 2.5D segmentation is  $(75 \pm 20) \%$  of the true number in the GT.  $(9 \pm 10) \%$  of them can be considered  
146 false on macro-average (i.e. they are not present in the GT) while  $(5 \pm 3) \%$  of true neurons are  
147 missed (i.e. annotated in the GT but not segmented). Finally,  $(23 \pm 10) \%$  of the identified objects are  
148 groups of 2 or more GT neurons merged together into a single object. Indeed, in some circumstances,  
149 a single polyhedron found by the network covered more than one real neuron in the ground truth  
150 (Supplementary Fig. 3). For each sample, in the supplementary information we report a complete  
151 description of all the results.

### 152 **2.4 Neuronal distribution analysis**

153 The four datasets acquired with the TPFM were processed with the 2.5D automatic segmentation  
154 method, obtaining meshes for every single neuron in the whole volume (Supplementary video 2).  
155 Figure 4 shows a 3D rendering of the meshes for each specimen obtained using the 2.5D approach.  
156 The rendering highlights the anatomical architecture of the six cortical layers.

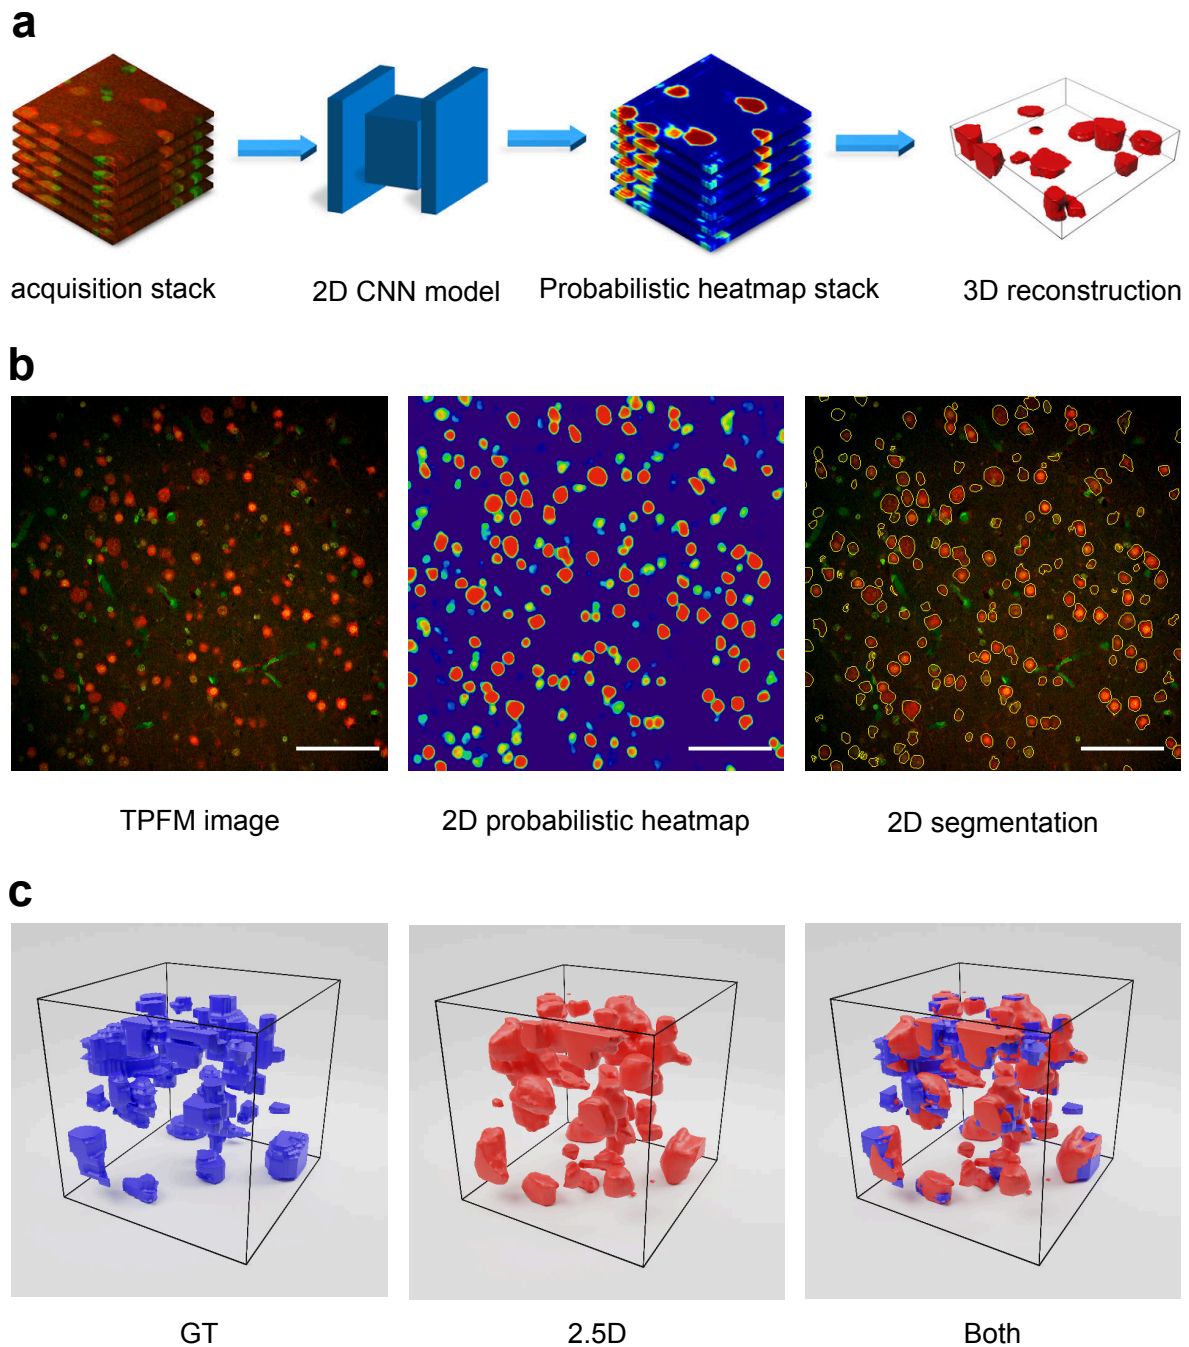

Figure 3: **The 2.5D approach.** (a) Neuronal segmentation workflow of the 2.5D approach. (b) A representative image undergoing the CNN analysis. From the native image to cells contour segmentation. Scale bar = 100  $\mu\text{m}$  (c) 3D representation of the neurons of a stack manually annotated by the operator (in blue), automatically identified by the 2.5D approach (in red), and the superposition of the two.



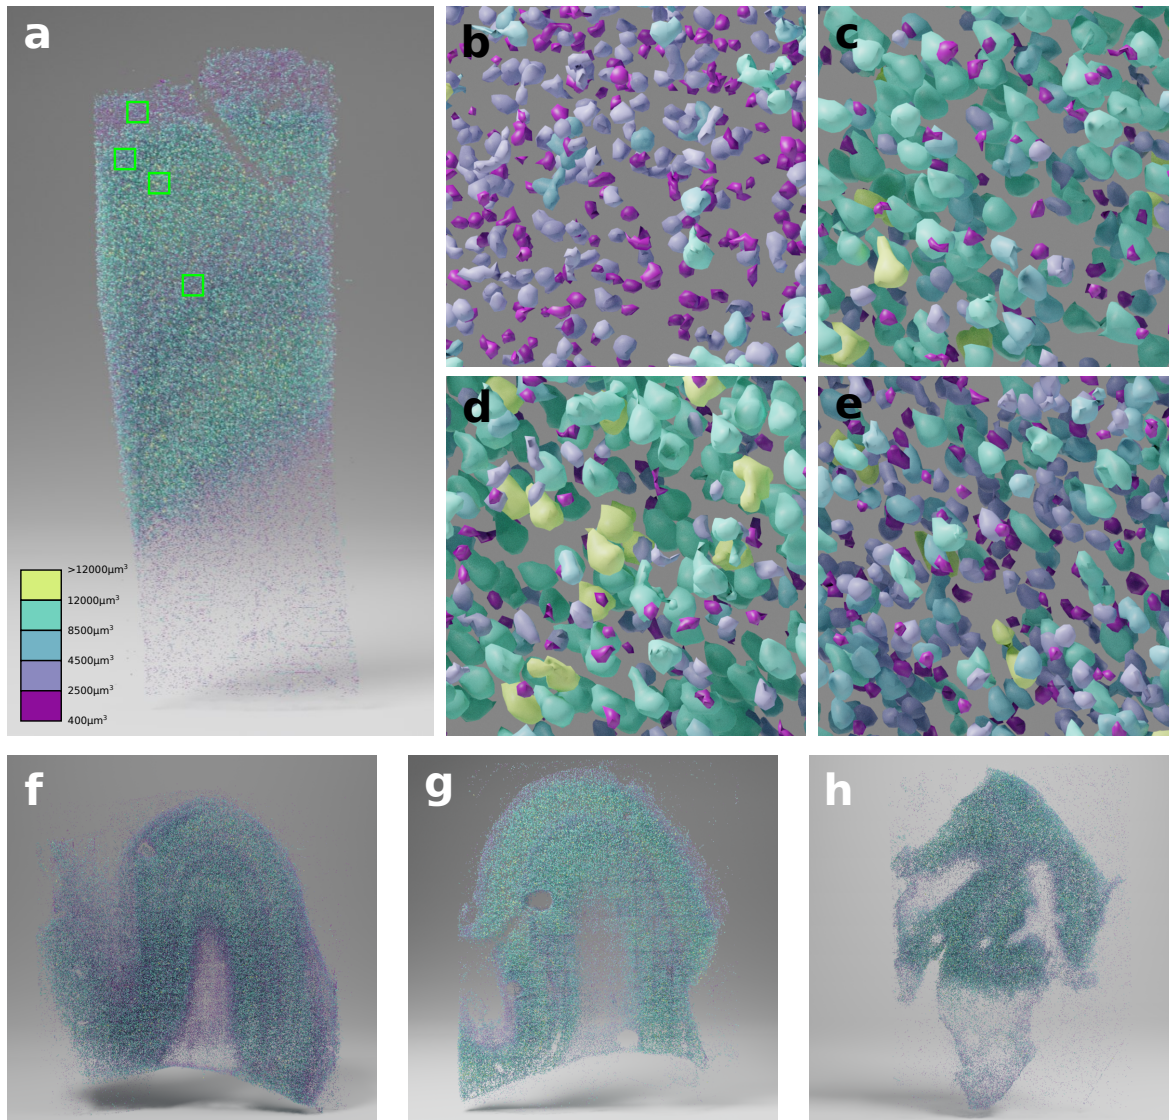

Figure 4: **3D rendering of the segmented neurons.** Panels a, f, g, h show the 3D rendering for specimens 1, 2, 3 and 4 respectively. The magnified view of the highlighted squares in panel a from top to bottom are shown in panels b, c, d, e, highlighting the neuronal size and density in the different cortical layers.

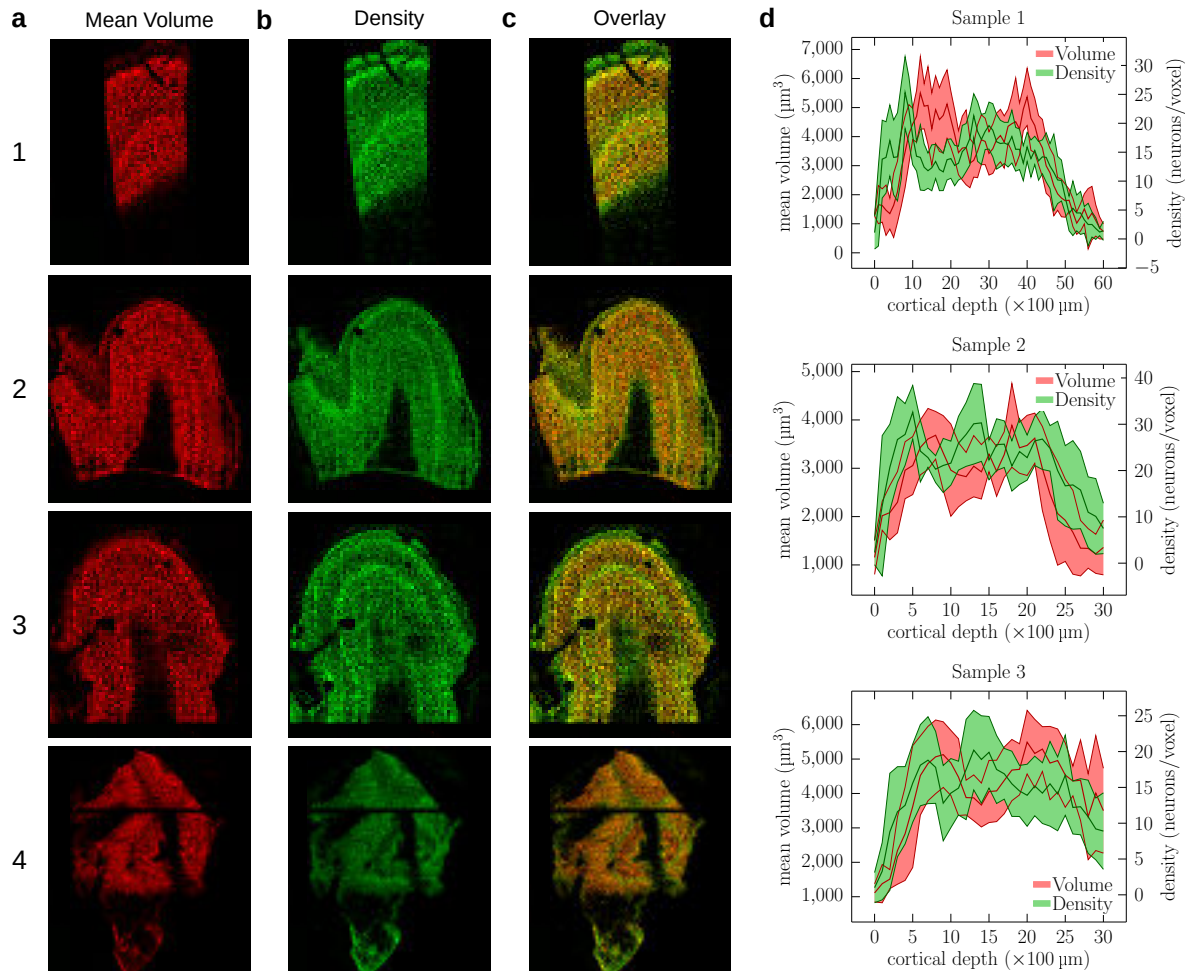

Figure 5: **Neuronal distribution analysis.** Representative maps of the mean volume (a), neuronal density distribution (b), and overlay of the two maps (c) of the middle plane of each specimen. The maps were computed by performing a 3D binning of  $100\ \mu\text{m}^3$ . Panel (d) shows the neuronal density and mean volume profiles across the cortex as obtained from the maps shown in panels (a) and (b) along 10 different lines that are drawn orthogonal to the cortical layers; the thick line shows the mean value whereas the filled area shows one standard deviation.

|            | Layer | N. Neurons | Tissue volume<br>(mm <sup>3</sup> ) | Density<br>(10 <sup>3</sup> mm <sup>-3</sup> ) | Mean Volume<br>(μm <sup>3</sup> ) | Filling<br>fraction |
|------------|-------|------------|-------------------------------------|------------------------------------------------|-----------------------------------|---------------------|
| Specimen 1 |       |            |                                     |                                                |                                   |                     |
|            | 1     | 15320      | 2.880                               | 5.319                                          | 2603                              | 1.38 %              |
|            | 2     | 6454       | 0.486                               | 13.280                                         | 2916                              | 3.87 %              |
|            | 3     | 19859      | 1.758                               | 11.296                                         | 4441                              | 5.02 %              |
|            | 4     | 25031      | 1.814                               | 13.799                                         | 3549                              | 4.90 %              |
|            | 5     | 13972      | 1.300                               | 10.748                                         | 4358                              | 4.68 %              |
|            | 6     | 6756       | 0.769                               | 8.785                                          | 2263                              | 1.99 %              |
|            | tot.  | 87392      | 9.007                               | 9.703                                          | 3569                              | 21.8 %              |
| Specimen 2 |       |            |                                     |                                                |                                   |                     |
|            | 1     | 69020      | 11.533                              | 5.985                                          | 2550                              | 1.5 %               |
|            | 2     | 84013      | 11.724                              | 7.166                                          | 2567                              | 1.8 %               |
|            | 3     | 102169     | 12.789                              | 7.989                                          | 2922                              | 2.3 %               |
|            | 4     | 57665      | 2.413                               | 23.898                                         | 2730                              | 6.5 %               |
|            | 5     | 42225      | 2.199                               | 19.202                                         | 3324                              | 6.4 %               |
|            | 6     | 20289      | 1.054                               | 19.250                                         | 1989                              | 3.8 %               |
|            | tot.  | 375381     | 41.712                              | 8.999                                          | 2740                              | 22.4 %              |
| Specimen 3 |       |            |                                     |                                                |                                   |                     |
|            | 1     | 13815      | 1.646                               | 8.393                                          | 2105                              | 1.8 %               |
|            | 2     | 22348      | 1.432                               | 15.606                                         | 3412                              | 5.3 %               |
|            | 3     | 42890      | 3.464                               | 12.382                                         | 4627                              | 5.7 %               |
|            | 4     | 29834      | 1.804                               | 16.538                                         | 3524                              | 5.8 %               |
|            | 5     | 33230      | 2.387                               | 13.921                                         | 4584                              | 6.4 %               |
|            | 6     | 30694      | 5.656                               | 5.427                                          | 3410                              | 1.9 %               |
|            | tot.  | 172811     | 16.389                              | 10.544                                         | 3853                              | 26.9 %              |
| Specimen 4 | tot.  | 177286     | 12.694                              | 13.966                                         | 3008                              | 4.2 %               |

Table 2: Number, mean volume and density of the neurons in the six layers and in the total volume of the cortex.

157 To quantify the structural organization in the analyzed tissues, we calculated the mean volume  
158 distribution and neuronal density distribution. The corresponding maps were obtained, for each  
159 specimen, with a binning volume of  $(100 \times 100 \times 100) \mu\text{m}^3$  (Figure 5a, b, c). We calculated the  
160 densities and the percentage of neuronal volume with respect to the total volume of the grey matter  
161 of the sample. To do that, a mask for the grey matter of each samples was manually drawn. To  
162 quantify the neuronal distribution along the six cortical layers, masks of each layer volume were  
163 manually drawn for each sample. The HME biopsy (sample 4) showed a disruption of the structural  
164 organization of the cortex, making layer classification impossible (Supplementary Figure 2). We then  
165 measured the volume and density profiles along with cortex depth, which highlight different peaks  
166 (Figure 5d). Indeed, volume profiles show peaks in layers 3 and 5, while the neuronal density has a  
167 peak in layers 2 and 4. The results of counting are shown in table 2.

### 168 3 Discussion

169 In this work, we propose a pipeline that addresses some of the most critical challenges of human  
170 brain mapping (i.e., sample preparation and big data analysis), enabling a 3D characterization of the  
171 cytoarchitecture of the tissue at high resolution. In particular, we develop an approach that allows  
172 neuronal segmentation, permitting to evaluate both cell density and mean volumes in mesoscopic  
173 reconstruction.

174 In comparison to animal brains, human neural tissues presents high variability of post-mortem

175 fixation conditions and antigens alterations that prevent proper immunostaining recognition. In this  
176 work, we combined the SWITCH tissue transformation method with the TDE clearing. The SWITCH  
177 technique allows removing lipids from the sample, while maintaining structural integrity, leading to an  
178 increase of tissue permeability and a reduction of the tissue refractive index (RI). The TDE clearing  
179 method allows homogenizing the RI of the sample with that of the mounting medium to reach the final  
180 transparency. The optimized protocol can perform tissue clearing on prolonged formalin-fixed brain  
181 samples and homogeneously stain the tissue with small molecules (up to 1 mm in depth) as well as  
182 antibodies (up to 500  $\mu\text{m}$ ). The compatibility of the protocol with different antibodies is demonstrated  
183 by staining neuronal and non-neuronal cells as well as blood vessels with different antibodies. To  
184 illustrate the versatility of the method, we used the SWITCH/TDE approach to prepare volumetric  
185 samples ( $\text{mm}^3$ -sized volume) from different areas of the cerebral cortex from adult control subjects and  
186 pediatric patients with malformations of cortical development. The entire volumes, labeled with anti-  
187 NeuN antibody and DAPI, were acquired using a custom-made Two-Photon Fluorescence Microscope  
188 (TPFM) capable of performing mesoscopic reconstruction. The optical sectioning and the high-  
189 resolution optical investigation made possible by TPFM, in combination with the tissue clearing  
190 technique, allowed imaging the 3D organization of whole neurons without introducing any visual  
191 artifacts.

192 Volumetric imaging of samples generates a large amount of data (from tens of GB to tens of TB)  
193 that need to be processed in an automated fashion to extract reliable and quantitative information.  
194 The software tools we developed in this study made it possible to analyze such big data. As a first  
195 step, we stitched together the 3D tiles acquired using the TPFM microscope. Adjacent tiles were  
196 aligned and merged by evaluating the cross-correlation of the overlapping areas. Once stitched, we  
197 performed an automatic cell segmentation analysis based on a 2.5D Machine Learning approach to  
198 achieve a realistic assessment of the neuronal volume. A native 3D implementation of convolutional  
199 neural networks, while desirable, is demanding in terms of the required processing power and the  
200 extent of the ground truth needed for training. We address the challenges of volumetric segmentation  
201 by reformulating the problem as a 2D pixel-based classification task followed by a 3D reconstruction  
202 step. The neural network processes each frame independently from the data contained within the  
203 previous or the following frame, producing a bidimensional probability map where the value of each  
204 pixel is the probability of that very pixel to belong to the foreground class (neuron). By stacking  
205 these 2D probability maps, we applied isosurface search algorithms to obtain the 3D representation  
206 of the segmented object. While solving a pure 3D problem would imply exploring a cubic space of  
207 parameters, our 2.5D reconstruction deals with a quadratic space. Since the number of examples  
208 grows exponentially with the space dimensionality, it follows that this 2.5D approach requires much  
209 fewer manually annotated examples.

210 We exploited the 2.5D automatic segmentation method to quantitatively analyze four different  
211 specimens (two different samples of prefrontal cortex from an adult and elderly subject, one dysplastic  
212 brain sample from the left temporo-occipital cortex of a patient with FCDIIa, and one dysplastic brain  
213 sample from the left temporo-parietal cortex of a patient with HME) cleared with the SWITCH/TDE  
214 technique and acquired with the TPFM. The 2.5D approach permitted to define the anatomical  
215 organization of the neurons in 3D. Indeed, the characterization of density distribution and mean  
216 volume allowed us to assess the morphological differences between the arrangement of the layers in  
217 the analyzed samples. However, given the small number of samples we analyzed and the general  
218 purpose of this study, we did not assess the possible differences between control and dysplastic brain  
219 tissues.

220 In conclusion, we optimized a pipeline that combines the SWITCH/TDE method, a new proto-  
221 col to clear human brain tissue, with a 2.5D segmentation approach, a technique that makes use of  
222 convolutional neural networks to automatically extract information on neuronal volumes and density.  
223 The volumetric assessment gives the possibility to extract morphological information that helps dis-  
224 criminating cell types using general staining as NeuN, reducing the labels necessary for the analysis  
225 (a critical point in human tissue preparation). Moreover, in the future, the assessment of volume

226 variability could be used in pathological studies to assess, more reliably, the morphological alteration  
227 of neurons, increasing the statistical accuracy and the sensitivity of the evaluation. Our work has the  
228 purpose of providing a synergic approach enabling a reliable human brain mapping, while address-  
229 ing the different aspects of quantitative 3D reconstruction analysis. Despite the innovation proposed  
230 here, there are still several points that need to be considered to obtain a faster, high-throughput, and  
231 informative automated characterization of tissue architecture. A further implementation of the CNN  
232 could reduce the errors associated with automatic neuronal counting. At the same time, a combi-  
233 nation with a faster optical technique, such as light-sheet microscopy, could facilitate scaling up the  
234 analysis. Nevertheless, we believe that our pipeline could be used in the future, not only to provide  
235 the anatomical description of samples but also to reduce interpretation biases and to obtain a more  
236 precise diagnostic neuropathological assessment.

## 237 4 Methods

### 238 4.1 Human brain specimen collection

239 The study was approved by the Pediatric Ethic Committees of the Tuscany Region (under the project  
240 RF-2013-02355240 funded by the Italian Ministry of Health and the Tuscany Region). Healthy tissue  
241 samples were obtained from the body donation program (Association des dons du corps) of Université  
242 de Tours and from the Body Donation Program “Donation to Science” of the University of Padova.  
243 Prior to death, participants gave their written consent for using their entire body – including the brain  
244 – for any educational or research purpose in which anatomy laboratory is involved. The authorization  
245 documents (under the form of handwritten testaments) are kept in the files of the Body Donation  
246 Program. Pediatric human brain samples were removed during surgical procedures for the treatment of  
247 drug-resistant epilepsy in children with malformations of cortical development. Samples were obtained  
248 after informed consent, according to the guidelines of the Pediatric Research Ethics Committee of the  
249 Tuscany Region. Upon collection, samples were placed in neutral buffered formalin (pH 7.2–7.4)  
250 (Diapath, Martinengo, Italy) and stored at room temperature until the transformation and clearing  
251 process.

### 252 4.2 The SWITCH/TDE clearing and labelling protocol

253 Blocks of fixed samples were washed with a Phosphate Buffered Saline (PBS) solution at 4 °C with  
254 gentle shaking for one month to remove formalin from the tissue. Blocks were embedded in a low  
255 melting agarose (4% in 0.01 M PBS) and cut into  $(450 \pm 50)$   $\mu\text{m}$  coronal sections with a vibratome  
256 (Vibratome 1000 Plus, Intracel LTD, UK). After the cutting, the agarose surrounding each slice was  
257 removed. The permeabilization and staining protocols were modified from that of Murray et al.  
258 2015 [9], as described below. Samples were first incubated in the ice-cold SWITCH-OFF solution (4%  
259 GA in PBS 1 X and KHP 0.1 M, titrated with HCl to pH = 3) for 1 day at 4 °C with gentle shaking,  
260 then incubated for 1 day in the SWITCH-ON solution (0.5% GA in PBS 1 X, pH = 7.6) for 1 day at  
261 4 °C with gentle shaking. After two washing steps in the PBST solution (PBS with 1% Triton X-100,  
262 pH = 7.6) for 4 hours at room temperature (RT), the samples were inactivated with a solution of 4%  
263 w/v acetamide and 4% w/v glycine with a pH = 9 (overnight incubation at 37 °C). Two washing steps  
264 in PBST solution for 4 hours at room temperature (RT) were performed before the incubation in the  
265 Clearing Solution (200 mM SDS, 20 mM Na<sub>2</sub>SO<sub>3</sub>, 20 mM H<sub>3</sub>BO<sub>3</sub>, pH = 9) at 70 °C for lipids removal.  
266 Incubation time in clearing solution was adapted depending on tissue characteristics: samples from  
267 pediatric patients were kept overnight (6–8 hours), while samples from adult and elderly subject up  
268 to one day, until complete transparency was achieved. Two washing steps in the PBST solution for  
269 8 hours at room temperature (RT) were performed to prepare the sample for the labeling process.  
270 Primary antibodies were incubated in the PBST solution for one day at 4 °C. After two washing steps  
271 in the PBST solution for 8 hours at RT, secondary antibodies were incubated in PBST for one day

272 at RT. Table 1 reports the list of antibodies and dilutions used. After two washing steps of 8 hours  
273 with PBST at RT, samples were fixed with a 4% solution of paraformaldehyde (PFA) for 10 min  
274 at 4°C to avoid antibody detachment. Samples were then washed three times with PBS for 10 min  
275 at RT to remove the excess of PFA. Optical clearing consists in incubation in solutions of increasing  
276 concentrations of 20%, 40% and 68% (vol/vol) of 2, 2'-thiodiethanol in 0.01 M PBS (TDE/PBS), each  
277 for 1 day at room temperature (RT) with gentle shaking. For nuclear staining, DAPI or SYTOX<sup>TM</sup>  
278 Green were diluted in the last incubation of the sample in the 68% (vol/vol) TDE/PBS solution. For  
279 1 mm thick samples, the incubation was performed for two days. Finally, samples were mounted in  
280 a custom made chamber with UV silica cover slip (UQG Optics, CFS-5215) that flattens the sample  
281 while keeping it completely covered by the TDE/PBS solution allowing a perfect RI matching which  
282 is essential for imaging. Sample pictures before and after the clearing process were acquired using a  
283 digital camera (Sony DSC-WX500), samples were kept soaked either in PBS or TDE.

### 284 4.3 Two-Photon Fluorescence Microscopy

285 A custom-made Two-Photon Fluorescence Microscope (TPFM) was built in order to enable mesoscopic  
286 reconstruction of cleared samples. A mode-locked Ti:Sapphire laser (Chameleon, 120 fs pulse width,  
287 80 MHz repetition rate, Coherent, CA) operating at 800 nm was coupled into a custom-made scanning  
288 system based on a pair of galvanometric mirrors (LSKGG4/M, Thorlabs, USA). The laser was focused  
289 onto the specimen by a refractive index tunable 25× objective lens (LD LCI Plan-Apochromat 25×/0.8  
290 Imm Corr DIC M27, Zeiss, Germany). The system was equipped with a closed-loop XY stage (U-  
291 780 PILine<sup>®</sup> XY Stage System, 135 × 85 mm travel range, Physik Instrumente, Germany) for radial  
292 displacement of the sample and with a closed-loop piezoelectric stage (ND7Z22LAQ PIFOC objec-  
293 tive scanning system, 2 mm travel range, Physik Instrumente, Germany) for the displacement of the  
294 objective along the z-axis. The fluorescence signal was collected by two independent GaAsP photomul-  
295 tiplier modules (H7422, Hamamatsu Photonics, NJ). Emission filters of (440 ± 40) nm, (530 ± 55) nm  
296 and (618 ± 25) nm were used to detect the signal, respectively, for DAPI, Sytox Green/Alexa 488,  
297 and Alexa Fluor 568. The instrument was controlled by a custom software, written in LabView  
298 (National Instruments, TX) able to acquire a whole sample by performing z-stack imaging (depth =  
299 (500 ± 100) μm) of adjacent regions with an overlap of 40 μm and a voxel size of (0.88 × 0.88 × 2) μm<sup>3</sup>.  
300 The acquisition was performed with a dwell time of 500 μs and the resulting 512 × 512 px images were  
301 saved as TIFF files.

### 302 4.4 Volumetric image stitching

303 To obtain a single file view of the sample imaged with the TPFM, the acquired stacks were fused  
304 together using the ZetaStitcher tool [23]. This software can take advantage of the overlap between  
305 neighboring stacks to correct the mechanical error of the imaging platform. Indeed, mesoscopic  
306 reconstruction with TPFM can take several days, and temperature changes and mounting medium  
307 evaporation can lead to some micron-scale distortion. The software is based on two steps: an alignment  
308 process followed by image fusion. As a first step, a 2D cross-correlation map is evaluated at several  
309 depths for every pair of adjacent 3D stacks, moving each stack relative to its neighbor. The final  
310 position of all stacks is determined by applying a global optimization algorithm to the displacements  
311 of the individual pairs. Finally, the stacks are fused into a 3D reconstruction of the whole sample  
312 stored in a single TIFF file. The raw datasets of the four samples under investigation in this paper  
313 are made available on the Ebrains platform provided by the Human Brain Project. The specific links  
314 to the downloadable material can be found at this link [?].

### 315 4.5 The Convolutional Neural Network (CNN)

316 We used a 2D Convolutional Neural Network for pixel-based classification expanding on the design  
317 employed in a previous work [24]. In this network architecture, 32 × 32 × 2 sized patches (i.e. con-

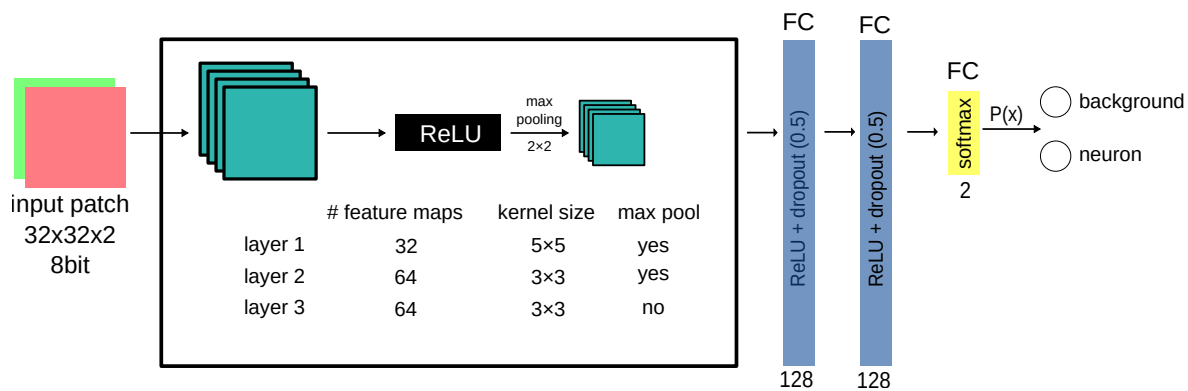

Figure 6: **The CNN architecture.** Block scheme of the architecture of the CNN with 3 convolutional layers and 3 Fully Connected layers.

318 sidering red and green channels) are extracted from the stitched volume, and fed to the CNN model  
 319 after a preprocessing step consisting of a single  $5 \times 5$  gaussian kernel filtering stage with  $\sigma = 3$ . This  
 320 operation replicates the intrinsic blurring introduced on each patch by the resampling function inte-  
 321 grated by the data augmentation procedure exploited in the training phase of the CNN. The neural  
 322 network architecture consists of three convolutional layers, the first two of which are followed by  $2 \times 2$   
 323 max-pooling downsampling, and three fully connected layers, the last of which (yellow) makes use of  
 324 a two-class softmax activation function. A block diagram of the overall network structure is shown  
 325 in Figure 6. Trainable parameters (205 024 in total) and optimizer hyper-parameters are described in  
 326 the supplementary information.

327 The so-defined CNN model classifies the central pixel of each input patch by exploiting the visual  
 328 pattern of the local neighbourhood (i.e. the coloured  $32 \times 32$  texture) to which the pixel belongs. The  
 329 model can be used for efficient inference on input data larger than the  $32 \times 32$  patches by exploiting  
 330 formal equivalence, named fully convolutional, between fully connected layers and  $1 \times 1$  convolutions  
 331 [25]. This allows us to efficiently produce heatmaps (i.e. probability maps) of entire stack frames.

332 The ground truth was annotated by two distinct operators on LAIRA<sup>®</sup> web-based collaborative  
 333 application [26]. By following an Active Learning paradigm [27] the network was incrementally trained  
 334 against a number of positive and negative samples originating from the four specimens to improve  
 335 inter-specimen statistical representatives: the final training dataset is composed of 112 images of  
 336  $512 \times 512$  px, corresponding to  $(450 \times 450) \mu\text{m}^2$ , for a total of 7312 manually annotated neurons (1180  
 337 from the first annotation without Active Learning). Additional independent 14 images (1505 neurons)  
 338 were used to validate the CNN and further 14 images (1208 neurons) to test it. Model regularization  
 339 is provided in the form of dropout layers, each with a dropout factor of 0.5.

340 The manually annotated ground truth used to train the neural network is also made available for  
 341 download on the Ebrains platform in Ximage format [28] (see Supplementary Information).

#### 342 4.6 The 2.5D approach: from 2D heatmaps to 3D polygon meshes

343 The CNN model converts entire 2-channel acquisition frames into probability heatmaps, these two-  
 344 dimensional maps are reassembled back into a 3D stack to obtain an estimate of the three-dimensional  
 345 probability distribution of neuronal soma presence. The heatmap stack undergoes a post-processing  
 346 step of false positive reduction represented by the application of a  $5 \times 5$  median filter and a gray-scale  
 347 morphological opening with a  $3 \times 3$  structuring element. We consider the isosurfaces of this field  
 348 corresponding to a 0.5 statistical threshold to be representative of the physical boundaries of neuron  
 349 soma; to calculate them we use a custom variant of the Marching Cubes algorithm [29] followed  
 350 by additional topological fixes on the identified variants of the objects to ensure that every soma is represented

351 by a 2-manifold watertight mesh. This approach allows us to retrieve a three-dimensional vectorial  
352 reconstruction of the segmented objects in the entire z-stack, although limited by a grouping effect  
353 that sometimes emerges after the instance segmentation step: neurons that are too close to each other  
354 are sometimes identified as a single unit (Supplementary Fig. 3). All the 2.5D computations have  
355 been performed on a standard linux-based workstation by the Aliquis<sup>®</sup> software ecosystem [30] with  
356 Google TensorFlow as CNN backend [31].

## 357 4.7 Data analysis

358 The physical boundaries of the neuronal soma were stored in the form of a triangular meshes in  
359 Alembic [32] binary file format, which is suitable for rendering and for further analysis. These files  
360 were then processed with Python scripts making use of the trimesh package [33]. The volumes and  
361 centroids of all the detected objects were extracted using trimesh.

362 For neuron counting, volume thresholds were applied to remove segmentation artifacts: volumes  
363 lower than  $400 \mu\text{m}^3$  and higher than  $12\,000 \mu\text{m}^3$  were discarded. To map neuronal density and volume  
364 distribution in the analyzed samples, we plotted 3D histograms with a binning of  $(100 \times 100 \times 100) \mu\text{m}^3$   
365 as shown in Figure 5 a, b, c. The centroid value was used to pinpoint the position of the identified  
366 neurons within the whole sample volume and in particular to assign each neuron to its corresponding  
367 cortical layer according to manually drawn masks. To plot the distributions shown in panel d, 10  
368 different lines were drawn on the binned maps perpendicularly to the cortical layers on which the  
369 profiles were extracted. Stacks, 3D stitched volume renderings and videos were obtained using both  
370 Fiji [34] and Blender [35].

## 371 4.8 Acknowledgments

372 We thank Raffaele Decaro from the University of Padova for providing a control human brain tissue  
373 specimen analyzed in this study. We express our gratitude to the donor involved in the body donation  
374 program of the Association des dons du corps du Centre Ouest, Tours, who made this study possible  
375 by generously donating his body to science. The research leading to these results has received fund-  
376 ing from the European Union's Horizon 2020 Framework Programme for Research and Innovation  
377 under the Specific Grant Agreement No. 785907 (Human Brain Project SGA2) and No. 945539 (Hu-  
378 man Brain Project SGA3). This research has also been supported by the Italian Ministry of Health  
379 and Tuscany Region (RF-2013-02355240), the Massachusetts General Hospital (The General Hospi-  
380 tal Corporation), Athinoula A. Martinos Center, The National Institute of Mental Health (NIMH)  
381 through the BRAIN Initiative Cell Census Network under award number 1U01MH117023-01, by the  
382 Italian Ministry for Education, University, and Research in the framework of the Eurobioimaging  
383 Italian Nodes (ESFRI research infrastructure) - Advanced Light Microscopy Italian Node, and by  
384 "Ente Cassa di Risparmio di Firenze" (private foundation) grant n. 24135. Bioretics srl, a company  
385 specialized in Machine Learning solutions for Computer Vision, is a subcontractor of LENS in the  
386 framework of the BRAIN Initiative Cell Census Network (n. 1U01MH117023-01). The content of this  
387 work is solely the responsibility of the authors and does not necessarily represent the official views of  
388 the National Institutes of Health.

## 389 4.9 Author contributions

390 I.C. and G.M. designed the experiments and made the biological analysis. I.C. developed the SWITCH/TDE  
391 method. I.C., E.L., A.L., and L.P. performed sample preparation. I.C. conducted TPFM imaging.  
392 G.M. developed the ZetaStitcher software, performed the mesoscopic reconstruction and curated the  
393 data. M.R. conceived the 2.5D approach. M.R., G.M., F.C., and I.C. oversaw the overall development  
394 of the 2.5D processing pipeline. G.L., and A.S. performed the 3D reconstruction, M.N. operated and  
395 tested the neural network. I.C. and A.L. annotated the ground truth, F.C. prepared the 3D render-  
396 ings. C.D. provided the elderly human brain tissue specimen. V.C. and R.G. provided the pediatric



397 human brain tissue specimens and contributed to the concept of the biological evaluation. I.C., G.M.,  
398 L.S., and F.S.P. supervised the project. I.C. and G.M. wrote the paper with inputs from all authors.

#### 399 **4.10 Competing financial interests**

400 M.R. is CEO of Bioretics srl, a company specialized in Machine Learning solutions for Computer  
401 Vision, while G.L., M.N., and A.S. are employees. The ALIQUIS<sup>®</sup> framework and the LAIRA<sup>®</sup>  
402 application are products of Bioretics srl.

#### 403 **4.11 Data availability**

404 Data supporting the findings of this study are included in figures and videos as representative images  
405 or data points in the plots. The raw data of the mesoscopic reconstructions and the ground truth  
406 masks are available on the EBRAINS platform at URLs provided in the Methods. Additional images  
407 other than the representative images are available from the corresponding author upon reasonable  
408 request.

#### 409 **4.12 Code availability**

410 ZetaStitcher, the CNN model, and 2.5D approach codes are open source and available at URLs  
411 provided in the methods and in the supplementary information. The other custom codes used in this  
412 study are available from the corresponding author upon reasonable request.

## 413 **References**

- 414 [1] Clarke, G. *et al.* Whole-specimen histopathology: a method to produce whole-mount breast serial  
415 sections for 3-d digital histopathology imaging. *Histopathology* **50**, 232–242 (2007).
- 416 [2] Costantini, I., Cicchi, R., Silvestri, L., Vanzi, F. & Pavone, F. S. In-vivo and ex-vivo optical  
417 clearing methods for biological tissues. *Biomedical optics express* **10**, 5251–5267 (2019).
- 418 [3] Ueda, H. R. *et al.* Tissue clearing and its applications in neuroscience. *Nature Reviews Neuro-*  
419 *science* 1–19 (2020).
- 420 [4] Chung, K. *et al.* Structural and molecular interrogation of intact biological systems. *Nature* **497**,  
421 332–337 (2013).
- 422 [5] Costantini, I. *et al.* A versatile clearing agent for multi-modal brain imaging. *Scientific reports*  
423 **5**, 9808 (2015).
- 424 [6] Morawski, M. *et al.* Developing 3d microscopy with clarity on human brain tissue: Towards a  
425 tool for informing and validating mri-based histology. *Neuroimage* **182**, 417–428 (2018).
- 426 [7] Ando, K. *et al.* Inside alzheimer brain with clarity: senile plaques, neurofibrillary tangles and  
427 axons in 3-d. *Acta neuropathologica* **128**, 457–459 (2014).
- 428 [8] Liu, A. K. L. *et al.* Bringing clarity to the human brain: visualization of lewy pathology in three  
429 dimensions. *Neuropathology and applied neurobiology* **42**, 573–587 (2016).
- 430 [9] Murray, E. *et al.* Simple, scalable proteomic imaging for high-dimensional profiling of intact  
431 systems. *Cell* **163**, 1500–1514 (2015).
- 432 [10] Phillips, J. *et al.* Development of passive clarity and immunofluorescent labelling of multiple  
433 proteins in human cerebellum: understanding mechanisms of neurodegeneration in mitochondrial  
434 disease. *Scientific reports* **6**, 26013 (2016).

- 435 [11] Lai, H. M. *et al.* Next generation histology methods for three-dimensional imaging of fresh and  
436 archival human brain tissues. *Nature communications* **9**, 1–12 (2018).
- 437 [12] Park, Y.-G. *et al.* Protection of tissue physicochemical properties using polyfunctional crosslink-  
438 ers. *Nature biotechnology* **37**, 73–83 (2019).
- 439 [13] Ku, T. *et al.* Elasticizing tissues for reversible shape transformation and accelerated molecular  
440 labeling. *Nature Methods* 1–5 (2020).
- 441 [14] Liebmann, T. *et al.* Three-dimensional study of alzheimer’s disease hallmarks using the idisco  
442 clearing method. *Cell reports* **16**, 1138–1152 (2016).
- 443 [15] Casoni, F. *et al.* Development of the neurons controlling fertility in humans: new insights from  
444 3d imaging and transparent fetal brains. *Development* **143**, 3969–3981 (2016).
- 445 [16] Hildebrand, S., Schueth, A., Herrler, A., Galuske, R. & Roebroek, A. Scalable labeling for  
446 cytoarchitectonic characterization of large optically cleared human neocortex samples. *Scientific*  
447 *reports* **9**, 1–10 (2019).
- 448 [17] Smbl, U. *et al.* Automated scalable segmentation of neurons from multispectral images. In  
449 *Advances in neural information processing systems*, 1912–1920 (2016).
- 450 [18] Zhang, D. *et al.* Automated 3d soma segmentation with morphological surface evolution for  
451 neuron reconstruction. *Neuroinformatics* **16**, 153–166 (2018).
- 452 [19] Dong, M. *et al.* 3d cnn-based soma segmentation from brain images at single-neuron resolution.  
453 In *2018 25th IEEE International Conference on Image Processing (ICIP)*, 126–130 (IEEE, 2018).
- 454 [20] Frasconi, P. *et al.* Large-scale automated identification of mouse brain cells in confocal light sheet  
455 microscopy images. *Bioinformatics* **30**, i587–i593 (2014).
- 456 [21] Ronneberger, O., Fischer, P. & Brox, T. U-net: Convolutional networks for biomedical image  
457 segmentation. In *International Conference on Medical image computing and computer-assisted*  
458 *intervention*, 234–241 (Springer, 2015).
- 459 [22] ek, ., Abdulkadir, A., Lienkamp, S. S., Brox, T. & Ronneberger, O. 3d u-net: learning dense  
460 volumetric segmentation from sparse annotation. In *International conference on medical image*  
461 *computing and computer-assisted intervention*, 424–432 (Springer, 2016).
- 462 [23] Mazzamuto, G. ZetaStitcher: a tool for large volumetric image stitching. URL  
463 <https://github.com/lens-biophotonics/ZetaStitcher/>.
- 464 [24] Mazzamuto, G. *et al.* Automatic segmentation of neurons in 3d samples of human brain cortex.  
465 In *International Conference on the Applications of Evolutionary Computation*, 78–85 (Springer,  
466 2018).
- 467 [25] Lin, M., Chen, Q. & Yan, S. Network in network. *arXiv preprint arXiv:1312.4400* (2013).
- 468 [26] Bioretics srl. LAIRA. URL <https://laira.bioretics.com>.
- 469 [27] Settles, B. Active learning literature survey. Tech. Rep., University of Wisconsin-Madison De-  
470 partment of Computer Sciences (2009).
- 471 [28] Bioretics srl. Ximage. URL <https://github.com/bioretics/ximage>.
- 472 [29] Lorensen, W. E. & Cline, H. E. Marching cubes: A high resolution 3d surface construction  
473 algorithm. *ACM siggraph computer graphics* **21**, 163–169 (1987).

- 474 [30] Bioretics srl. ALIQUIS. URL <https://www.bioretics.com/aliquis>.
- 475 [31] Abadi, M. *et al.* TensorFlow: Large-scale machine learning on heterogeneous systems (2015).  
476 URL <https://www.tensorflow.org/>. Software available from tensorflow.org.
- 477 [32] Lucasfilm Ltd, S. Alembic. URL <http://www.alembic.io>.
- 478 [33] Dawson-Haggerty et al. trimesh. URL <https://trimsh.org/>.
- 479 [34] Schindelin, J. *et al.* Fiji: an open-source platform for biological-image analysis. *Nature methods*  
480 **9**, 676–682 (2012).
- 481 [35] Blender Online Community. *Blender - a 3D modelling and rendering package*. Blender Founda-  
482 tion, Stichting Blender Foundation, Amsterdam (2018). URL <http://www.blender.org>.
