# Supplementary material for: A combined pipeline for quantitative analysis of human brain cytoarchitecture
Source: bioRxiv or medRxiv preprint supplement (doi:10.1101/2020.08.06.219444), 2020-09-07
Supplement: Supplementary file [file media-3.pdf]

# Supplementary information

## A combined clearing and quantitative analysis pipeline for human brain optical mapping

Irene Costantini<sup>\*§1;2</sup>, Giacomo Mazzamuto<sup>\*2;1</sup>, Matteo Roffilli<sup>3</sup>, Filippo Castelli<sup>1;4</sup>,  
Mattia Neri<sup>3</sup>, Giovanni Lughì<sup>3</sup>, Andrea Simonetto<sup>3</sup>, Annunziata Laurino<sup>1</sup>,  
Erica Lazzeri<sup>1;4</sup>, Luca Pesce<sup>1;4</sup>, Christophe Destrieux<sup>5</sup>, Ludovico Silvestri<sup>1;2;4</sup>,  
Valerio Conti<sup>6</sup>, Renzo Guerrini<sup>6</sup>, Francesco S. Pavone<sup>1;2;4</sup>

<sup>1</sup>European Laboratory for Non-Linear Spectroscopy (LENS), University of Florence, Sesto Fiorentino, Italy

<sup>2</sup>National Institute of Optics (INO), National Research Council (CNR), Sesto Fiorentino, Italy

<sup>3</sup>Bioretics Srl, Cesena, Italy

<sup>4</sup>Department of Physics, University of Florence, Italy

<sup>5</sup>Unite iBrain UMRS INSERM U1253, Université de Tours, Tours, France

<sup>6</sup>Pediatric Neurology, Neurogenetics and Neurobiology Unit, and Laboratories, Children's Hospital A. Meyer, University of Florence, Florence, Italy.

§ corresponding author \*these authors contributed equally to the work

### 1. Immunostaining protocol optimization

Trials with different temperatures (37°C, @RT, and 4°C) and time of incubation (1 or 2 days) were performed in order to identify the best condition for optimal immunostaining. For each condition, images were acquired with the TPFM maintaining the same PMT gain and laser power. Signal to Background (S/B) analysis was performed with Fiji (<http://fiji.sc/Fiji>) to assess the best contrast: mean intensity of 10 square of 25px were analyzed for each condition, media and standard deviation were then calculated using OriginPro 9.0 (OriginLab Corporation). The protocol with the highest signal amplification corresponds to 4°C

24 of incubation temperature and 24 hours of incubation time of the primary antibody.

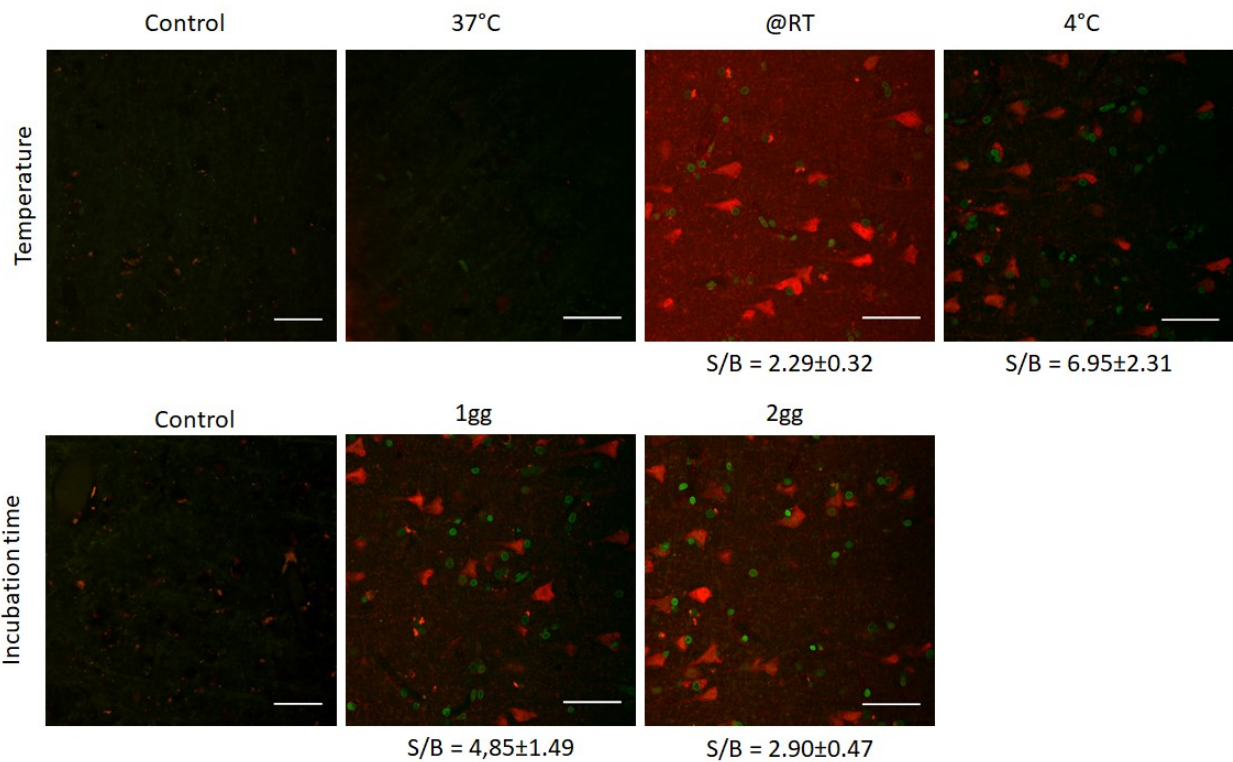

25

26 **Supplementary Figure 1: Immunostaining optimization.** Representative two-photon images of tissue stained  
27 with anti-NeuN antibody (in red) and DAPI (in green) at different temperatures and incubation times. Scale  
28 bar = 50  $\mu\text{m}$ .

## 29 **2. Manual segmentation of the grey matter**

30 In order to identify the different layers of the grey matter of the cortex, the maps obtained analyzing the  
31 mean volume distribution and the density distribution with a binning of  $100 \times 100 \times 100 \mu\text{m}^3$  were manually  
32 segmented using the software Fiji (Supplementary figure 2). Big blood vessels, tissue holes/breakages, and  
33 imaging artifacts were not reckoned drawing the masks. Sample 4 shows a disruption of the structural  
34 organization of the cortex, making layer classification impossible, only grey matter were segmented. The  
35 total volume for each mask was obtained performing this operation for all the z-plane of the sample.

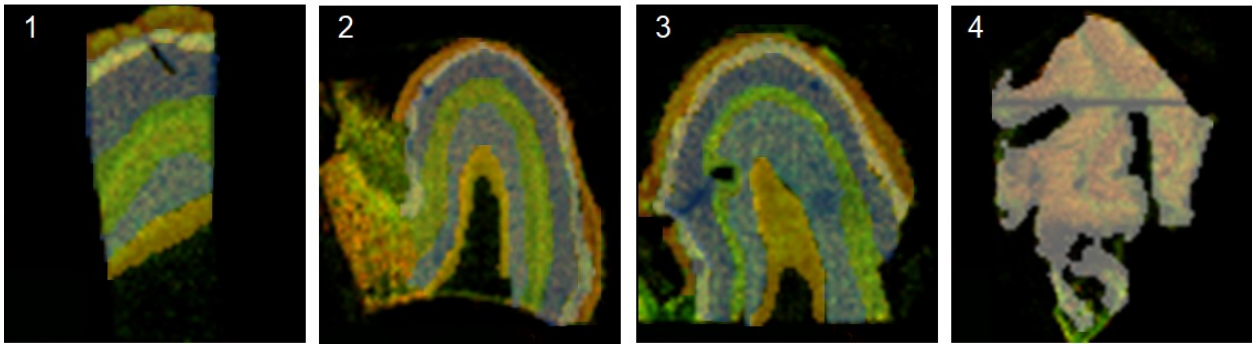

36  
37 **Supplementary Figure 2: Layers' assessment.** Layer masks (L1 red, L2 white, L3 blue, L4 green, L5 light blue,  
38 L6 yellow) of the middle plane of samples 1,2, and 3. Grey matter mask (in grey) is shown for sample 4.

### 39 **3. Convolutional Neural Networks (CNN) parameters**

40 The 2.5D CNN was implemented using the Aliquis® software ecosystem  
41 (<https://www.bioretics.com/aliquis>) version 2.4.3 with TensorFlow backend (<https://www.tensorflow.org>).  
42 Aliquis® is available online free of charge in capped mode.

43 The **network architecture** is as follows:

```
44     input 32x32x2 8-bit (promoted to float4 and remapped in range [0 1])
45     conv (relu) 32 5x5 + max pooling 2x2
46     conv (relu) 64 3x3 + max pooling 2x2
47     conv 64 3x3 (relu)
48     fc (relu) 128 + dropout (0.5)
49     fc (relu) 128 + dropout (0.5)
50     fc 2 (softmax)
```

51 The **network parameters** are as follows:

| Layer name (type)           | Output | N. params |
|-----------------------------|--------|-----------|
| conv2d_1 (Conv2D)           | 32     | 1632      |
| max_pooling2d_1 (MaxPool 2) | 32     | 0         |
| conv2d_2 (Conv2D)           | 64     | 18496     |
| max_pooling2d_2 (MaxPool 2) | 64     | 0         |
| conv2d_3 (Conv2D)           | 64     | 36928     |
| conv2d_4 (Conv2D)           | 128    | 131200    |
| dropout_1 (Dropout)         | 128    | 0         |
| conv2d_5 (Conv2D)           | 128    | 16512     |
| dropout_2 (Dropout)         | 128    | 0         |
| output (Conv2D)             | 2      | 256       |

53 Total params: 205,024  
54 Trainable params: 205,024  
55 Non-trainable params: 0

56 **Optimizer hyper-parameters** are as follows:

```
57     type: SGD (mini-batch stochastic)
58     batch size: 256
59     epochs: 300
60     scale: 0.003921568627 (= 1/255)
61     learning rate: 0.01
62     weight decay: 0.00001
63     momentum: 0.9
64     loss: infogain_categorical_crossentropy
65     infogain weight matrix: 0.7; 0; 0 ;1
```

66 The **datasets** extracted from the raw images are as follows:

67 Summary **per-image dataset**:

68 training = 112 (80%); validation = 14 (10%); test = 14 (10%)

69 Summary **per-patch dataset** (number of 32x32x2 samples):

70 Total = 2'293'760; background 0 = 2'147'474 (94%); neuron 1 = 146'286 (6%)

71 Detailed **per-patch dataset** (number of 32x32x2 samples):

72 Training set: background 0 = 1'717'979; neuron 1 = 117'029

73 Validation set: background 0 = 214'747; neuron 1 = 14'629

74 Only the training dataset has been data-augmented.

## 75 **4. CNN statistical assessment and grouping effect**

### 76 **4.1 CNN statistical assessment**

77 The CNN validation detailed information is listed in the attached file (2.5D assessment.zip). Data are

78 displayed for the four representative stacks of 100 x 100 x 100  $\mu\text{m}^3$ , both for the manual segmentation (GT)

79 and CNN automatic recognition. Performances are indicated for each neuron.

80 The manual segmentation has been performed on LAIRA® (<https://laira.bioretics.com>) and stored in the

81 Ximage open-source format (<https://github.com/bioretics/ximage>). LAIRA® is available free of charge in

82 trial mode.

### 83 **4.2 Grouping effect**

84 The 3D reconstruction of the meshes obtained through the 2.5D approach is sometimes characterized by a

85 grouping effect: neurons that are too close to each other are reconstructed as single units, as shown in

86 Supplementary Figure 3.

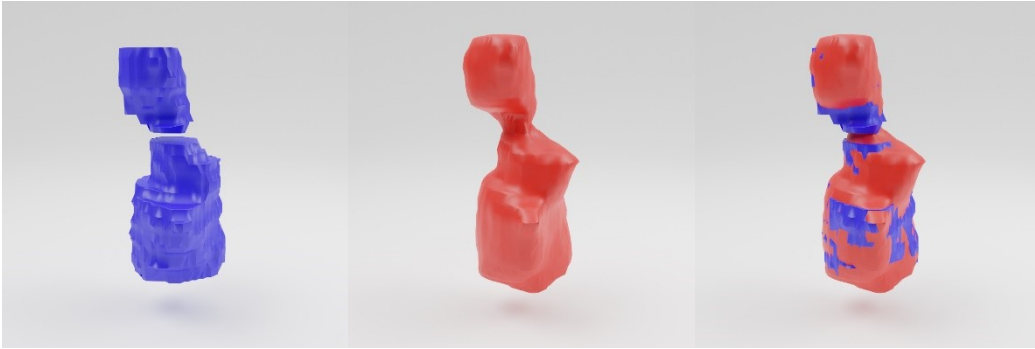

87

88 **Supplementary Figure 3: Example of a group.** 3D rendering of two neurons manually segmented (in blue),  
89 automatically reconstructed by the 2.5D approach (in red), and the superimposition of the two renderings.

## 90 **5. Videos legend**

91 **Video1:** Representative stack showing the neuronal segmentation obtained using the CNN. Imaging  
92 performed with TPFM, FOV of  $450 \times 450 \mu\text{m}^2$ . In red NeuN neuronal staining in green DAPI nuclei staining.

93 **Video2:** Navigation in the 3D rendering of the meshes of sample 1.

94
